# Supplementary material for: A novel immunofluorescent assay to investigate oxidative phosphorylation deficiency in mitochondrial myopathy: understanding mechanisms and improving diagnosis
Source: PubMed Central journal article supplement (PMC4606788; doi:10.1038/srep15037), 2015-10-15
Supplement: srep15037-s1.pdf [file srep15037-s1.pdf]

## A novel immunofluorescent assay to investigate oxidative phosphorylation deficiency in mitochondrial myopathy: understanding mechanisms and improving diagnosis

Mariana C. Rocha<sup>1,2#</sup>, John P. Grady<sup>1#</sup>, Anne Grünewald<sup>2</sup>, Amy Vincent<sup>2</sup>, Philip F. Dobson<sup>1</sup>  
Robert W. Taylor<sup>2</sup>, Doug M. Turnbull<sup>1,2</sup>, Karolina A. Rygiel<sup>1,2\*</sup>

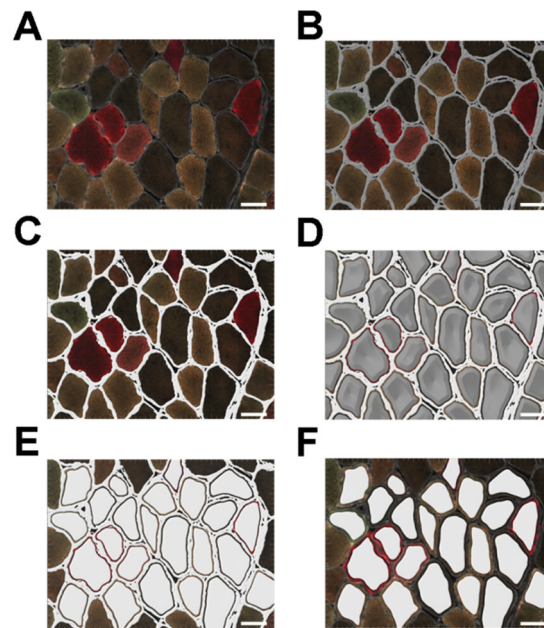

**Supplementary Fig. S1. Representative print-screen images showing the main steps of segmentation using IMARIS software. (A)** Images were opened in IMARIS as 16-bit czi files. **(B)** A first surface was created over the 405 nm channel in order to fully cover laminin labelling. **(C)** This surface was then used to create a laminin mask. **(D)** A second surface was created over the masked 405 nm channel thereby filling the area of muscle fibres. **(E)** Using “edit” tool bar unwanted areas, such as background, were removed. **(F)** The mean intensity of all four channels (405 nm, 488 nm, 546 nm, 647 nm) was measured automatically for selected individual muscle fibres. Scale bars measure 40µm.

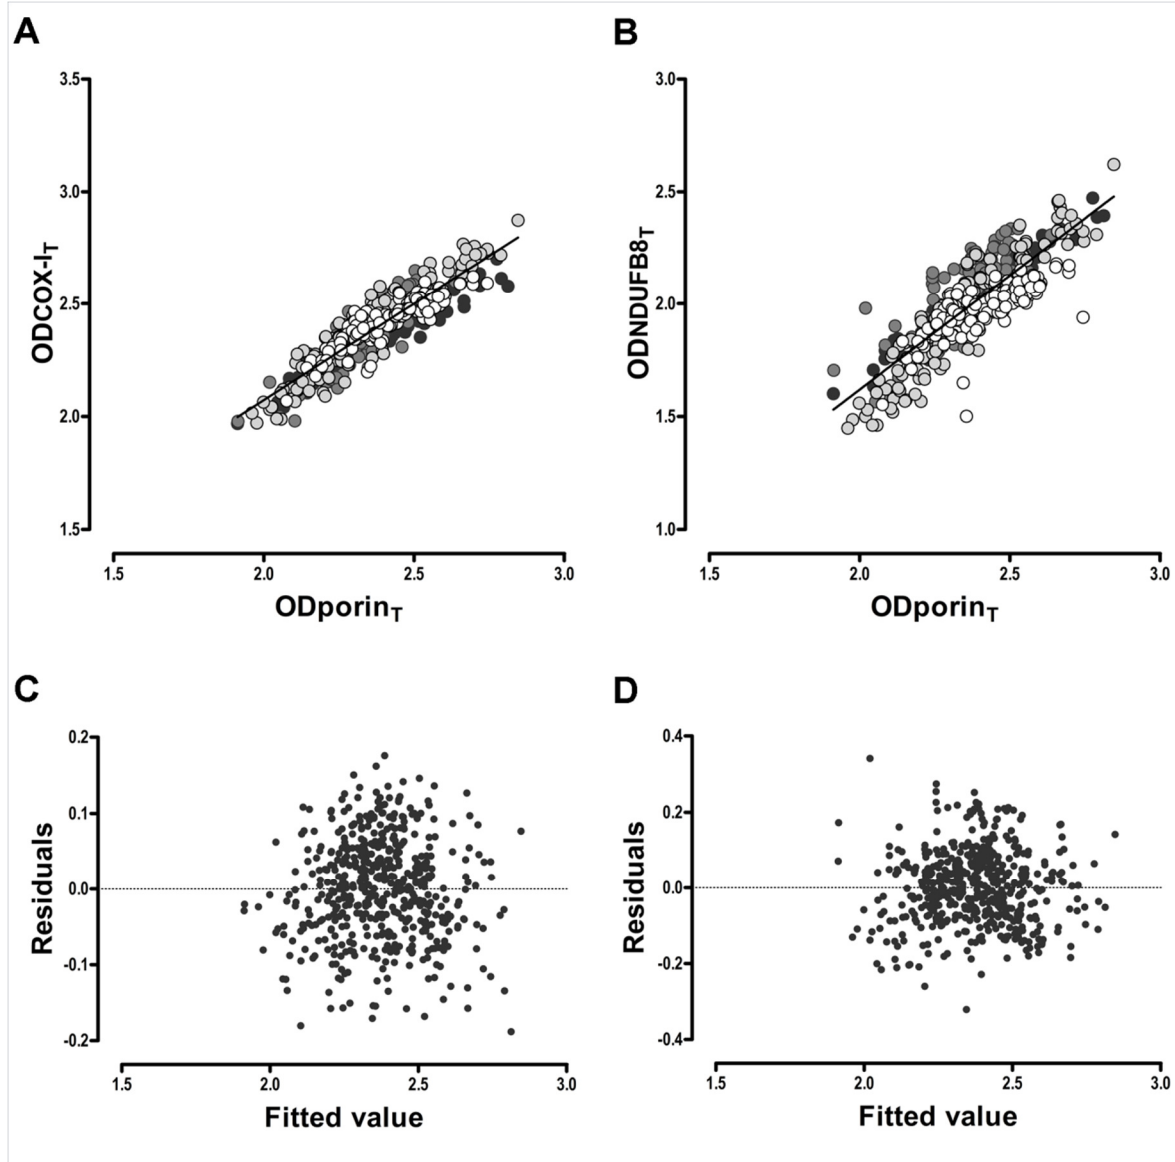

**Supplementary Fig. 2. Creation of the control group and establishment of ODCOX-I<sub>T</sub> and ODNDUFB8<sub>T</sub> linear regressions.** 128 fibres from each healthy and disease controls were randomly selected. **(A)** ODCOX-I<sub>T</sub> versus ODporin<sub>T</sub> and **(B)** ODNDUFB8<sub>T</sub> versus ODporin<sub>T</sub> were plotted together (Black circles: HC, dark grey circles: DC1, light grey circles: DC2, white circles: DC3) and used to perform the linear regressions of ODCOX-I<sub>T</sub> and ODNDUFB8<sub>T</sub>. The residual plots from **(C)** ODCOX-I<sub>T</sub> linear regression and **(D)** ODNDUFB8<sub>T</sub> linear regression showed a normal distribution validating the linear regression.

**Supplementary Table S1.** Primary and secondary antibodies used for immunofluorescence

| <b>Antibodies</b>               | <b>Host</b> | <b>Dilution</b> | <b>Company (Product number)</b> |
|---------------------------------|-------------|-----------------|---------------------------------|
| <b>Primary antibodies</b>       |             |                 |                                 |
| Laminin (IgG)                   | Rabbit      | 1:50            | Sigma-Aldrich (L9393)           |
| COX-I (IgG2a)                   | Mouse       | 1:100           | Abcam (Ab14705)                 |
| Porin (IgG2b)                   | Mouse       | 1:100           | Abcam (Ab14734)                 |
| NDUFB8 (IgG1)                   | Mouse       | 1:100           | Abcam (Ab110242)                |
| <b>Secondary antibodies</b>     |             |                 |                                 |
| Anti-rabbit Alexa Fluor 405 nm  | Goat        | 1:200           | Life Technologies (A31556)      |
| Anti-IgG2a Alexa Fluor 488 nm   | Goat        | 1:200           | Life Technologies (A21131)      |
| Anti-IgG2b Alexa Fluor 546 nm   | Goat        | 1:200           | Life Technologies (A21143)      |
| Anti-IgG1 biotin                | Goat        | 1:200           | Jackson IR Lab (115-065-205)    |
| Streptavidin Alexa Fluor 647 nm | Goat        | 1:100           | Life Technologies (S31556)      |

Key: Jackson IR Lab = Jackson ImmunoResearch Laboratories

**Supplementary Table S2.** Correlation of COX activity and COX-I expression

| Patients                             |          | Complex IV |        |        |       | n    |
|--------------------------------------|----------|------------|--------|--------|-------|------|
|                                      |          | Pos        | Int(+) | Int(-) | Neg   |      |
| P5<br>(Single mtDNA<br>deletion)     | VC       | 90.5%      | 1.5%   | 1.6%   | 6.3%  | 1103 |
|                                      | OC       | 92.9%      | 2.1%   | 2.2%   | 2.7%  | 841  |
|                                      | E(VC-OC) | -2.4%      | -0.6%  | -0.6%  | 3.6%  |      |
|                                      | p-value  | 0.06       | 0.34   | 0.33   | >0.05 |      |
| P9<br>(Multiple mtDNA<br>deletions)  | VC       | 67.0%      | 10.8%  | 7.5%   | 14.8% | 1395 |
|                                      | OC       | 69.3%      | 10.5%  | 6.0%   | 14.2% | 1071 |
|                                      | E(VC-OC) | -2.3%      | 0.3%   | 1.5%   | 0.6%  |      |
|                                      | p-value  | 0.21       | 0.81   | 0.14   | 0.69  |      |
| P12<br>(m.3243A>G<br><i>MT-TL1</i> ) | VC       | 83.6%      | 4.3%   | 4.1%   | 8.0%  | 1887 |
|                                      | OC       | 82.2%      | 3.6%   | 2.2%   | 12.0% | 1740 |
|                                      | E(VC-OC) | 1.4%       | 0.8%   | 1.8%   | -4.1% |      |
|                                      | p-value  | 0.25       | 0.23   | >0.05  | >0.05 |      |
| P19<br>(m.10010T>C<br><i>MT-TG</i> ) | VC       | 13.1%      | 2.3%   | 2.0%   | 82.6% | 956  |
|                                      | OC       | 11.6%      | 0.8%   | 0.7%   | 87.0% | 769  |
|                                      | E(VC-OC) | 1.5%       | 1.5%   | 1.3%   | -4.4% |      |
|                                      | p-value  | 0.34       | >0.05  | >0.05  | >0.05 |      |

Key: VC = visual classification based on COX/SDH histochemistry; OC = objective classification based on quantitative immunofluorescence; E(VC-OC) = estimate for difference between VC and OC; Z test for 2 population proportions.

**Supplementary Table S3.** Inter-observer variability of quadruple immunofluorescence.

| Patient P8    |           | COX-I / NDUFB8 levels |        |        |       | n   |
|---------------|-----------|-----------------------|--------|--------|-------|-----|
|               |           | Pos                   | Int(+) | Int(-) | Neg   |     |
| COX-I levels  | Invest. 1 | 67.7%                 | 4.7%   | 2.8%   | 24.9% | 470 |
|               | Invest. 2 | 71.6%                 | 1.5%   | 2.3%   | 24.6% | 528 |
|               | E(I1-I2)  | -3.9%                 | 3.2%   | 0.5%   | 0.3%  |     |
|               | p-value   | 0.18                  | >0.05  | 0.62   | 0.92  |     |
| NDUFB8 levels | Invest. 1 | 65.7%                 | 6.0%   | 4.7%   | 23.6% | 470 |
|               | Invest. 2 | 62.9%                 | 3.8%   | 4.0%   | 29.4% | 528 |
|               | E(I1-I2)  | 2.9%                  | 2.2%   | 0.7%   | -5.7% |     |
|               | p-value   | 0.35                  | 0.11   | 0.59   | 0.04  |     |

Key: Invest. 1 = investigator 1; Invest. 2 = investigator 2; E(I1-I2) = estimate for difference between investigator 1 and investigator 2; Z test for 2 population proportions.

**Supplementary Table S4.** Quantification of both COX-I and NDUFB8 deficiency and porin levels from all patients with mitochondrial disease.

| Patient                                                                      | COX-I |        |        |       |              | NDUFB8 |        |        |       |              | Porin  |      |        |     |       | n           |
|------------------------------------------------------------------------------|-------|--------|--------|-------|--------------|--------|--------|--------|-------|--------------|--------|------|--------|-----|-------|-------------|
|                                                                              | Pos   | Int(+) | Int(-) | Neg   | Abnormal     | Pos    | Int(+) | Int(-) | Neg   | Abnormal     | V.High | High | Normal | Low | V.Low |             |
| <b>Patients with known mutations affecting complex I and IV specifically</b> |       |        |        |       |              |        |        |        |       |              |        |      |        |     |       |             |
| <b>P1</b><br>( <i>LRPPRC</i> mutations)                                      | 0.2%  | 4.5%   | 17.3%  | 78.0% | <b>99.8%</b> | 99.6%  | 0.3%   | 0.1%   | 0.0%  | <b>0.4%</b>  |        |      | 100%   | <   |       | <b>1258</b> |
| <b>P2</b><br>(m.4175G>A <i>MT-ND1</i> )                                      | 99.9% | 0.1%   | 0.0%   | 0.0%  | <b>0.1%</b>  | 11.9%  | 0.3%   | 0.1%   | 87.8% | <b>88.1%</b> | 34%    | 20%  | 45%    | <   |       | <b>1062</b> |
| <b>Single, large-scale mtDNA deletion</b>                                    |       |        |        |       |              |        |        |        |       |              |        |      |        |     |       |             |
| <b>P3</b>                                                                    | 92.6% | 4.3%   | 2.7%   | 0.4%  | <b>7.4%</b>  | 93.1%  | 4.9%   | 1.8%   | 0.3%  | <b>6.9%</b>  |        |      | 98%    | 1%  | <     | <b>1027</b> |
| <b>P4</b>                                                                    | 92.7% | 4.4%   | 1.3%   | 1.6%  | <b>7.3%</b>  | 96.3%  | 1.9%   | 1.1%   | 0.7%  | <b>3.7%</b>  |        | <    | 99%    | <   |       | <b>1228</b> |
| <b>P5</b>                                                                    | 92.6% | 2.3%   | 2.3%   | 2.9%  | <b>7.4%</b>  | 95.6%  | 2.6%   | 1.7%   | 0.1%  | <b>4.4%</b>  | <      | 1%   | 99%    |     | <     | <b>841</b>  |
| <b>P6</b>                                                                    | 81.5% | 2.1%   | 2.3%   | 14.1% | <b>18.5%</b> | 88.4%  | 2.2%   | 2.2%   | 7.2%  | <b>11.6%</b> | 8%     | 25%  | 67%    | <   |       | <b>779</b>  |
| <b>Autosomal disorders of mtDNA maintenance (multiple mtDNA deletions)</b>   |       |        |        |       |              |        |        |        |       |              |        |      |        |     |       |             |
| <b>P7</b>                                                                    | 60.1% | 3.4%   | 3.8%   | 32.7% | <b>39.9%</b> | 49.2%  | 3.4%   | 4.4%   | 43.0% | <b>50.8%</b> | 32%    | 35%  | 34%    |     |       | <b>526</b>  |
| <b>P8</b>                                                                    | 71.6% | 1.5%   | 2.3%   | 24.6% | <b>28.4%</b> | 62.9%  | 3.8%   | 4.0%   | 29.4% | <b>37.1%</b> | 9%     | 28%  | 63%    |     |       | <b>528</b>  |
| <b>P9</b>                                                                    | 69.0% | 10.2%  | 6.3%   | 14.5% | <b>31.0%</b> | 62.0%  | 13.6%  | 14.4%  | 10.0% | <b>38.0%</b> | 1%     | 1%   | 96%    | 1%  | 1%    | <b>1071</b> |
| <b>P10</b>                                                                   | 72.4% | 5.1%   | 3.4%   | 19.1% | <b>27.6%</b> | 70.6%  | 14.8%  | 11.7%  | 2.9%  | <b>29.4%</b> | 1%     | 5%   | 94%    |     | <     | <b>1118</b> |
| <b>P11</b>                                                                   | 71.2% | 5.2%   | 2.7%   | 21.0% | <b>28.8%</b> | 54.4%  | 19.0%  | 4.1%   | 22.5% | <b>45.6%</b> | 7%     | 21%  | 71%    | 2%  | <     | <b>2400</b> |

| <b>m.3243A&gt;G <i>MT-TL1</i> mutation</b>       |       |       |      |       |              |       |       |       |       |              |    |     |     |     |    |             |
|--------------------------------------------------|-------|-------|------|-------|--------------|-------|-------|-------|-------|--------------|----|-----|-----|-----|----|-------------|
| <b>P12</b>                                       | 83.7% | 2.5%  | 1.8% | 12.0% | <b>16.3%</b> | 73.7% | 3.1%  | 1.5%  | 21.7% | <b>26.3%</b> | 1% | 2%  | 95% | 3%  | <  | <b>1328</b> |
| <b>P13</b>                                       | 69.1% | 11.0% | 9.4% | 10.4% | <b>30.9%</b> | 48.5% | 3.4%  | 2.8%  | 45.3% | <b>51.5%</b> | 9% | 15% | 75% | 1%  |    | <b>499</b>  |
| <b>P14</b>                                       | 90.6% | 4.4%  | 1.8% | 3.2%  | <b>9.4%</b>  | 64.6% | 3.3%  | 2.4%  | 29.6% | <b>35.4%</b> | 4% | 8%  | 87% | <   |    | <b>1441</b> |
| <b>P15</b>                                       | 89.1% | 3.0%  | 1.3% | 6.6%  | <b>10.9%</b> | 78.8% | 7.4%  | 1.9%  | 11.9% | <b>21.2%</b> | 1% | 1%  | 96% | 3%  | <  | <b>741</b>  |
| <b>P16</b>                                       | 67.0% | 16.7% | 7.0% | 9.4%  | <b>33%</b>   | 30.6% | 5.7%  | 11.8% | 52.0% | <b>69.4%</b> | 1% | 3%  | 79% | 17% | 1% | <b>918</b>  |
| <b>Other mt-RNA mutations</b>                    |       |       |      |       |              |       |       |       |       |              |    |     |     |     |    |             |
| <b>P17<br/>(m.5690A&gt;G<br/><i>MT-TN</i>)</b>   | 91.5% | 1.1%  | 1.2% | 6.2%  | <b>8.5%</b>  | 81.2% | 5.9%  | 3.6%  | 9.3%  | <b>18.8%</b> | 1% | 2%  | 97% | 1%  | <  | <b>1512</b> |
| <b>P18<br/>(Novel <i>MT-TP</i><br/>mutation)</b> | 0.5%  | 1.1%  | 2.5% | 95.9% | <b>99.5%</b> | 0.4%  | 0.5%  | 4.4%  | 94.7% | <b>99.6%</b> | 1% | 6%  | 92% | <   |    | <b>1012</b> |
| <b>P19<br/>(m.10010T&gt;C<br/><i>MT-TG</i>)</b>  | 11.6% | 0.8%  | 0.7% | 87.0% | <b>88.4%</b> | 13.5% | 2.2%  | 1.3%  | 83.0% | <b>86.5%</b> |    | 2%  | 90% | 6%  | 2% | <b>769</b>  |
| <b>P20<br/>(m.14709T&gt;C<br/><i>MT-TE</i>)</b>  | 74.1% | 5.7%  | 4.8% | 15.5% | <b>25.9%</b> | 58.0% | 3.3%  | 6.3%  | 32.5% | <b>42%</b>   | 2% | 4%  | 94% | <   |    | <b>1782</b> |
| <b>P21<br/>(m.5543T&gt;C<br/><i>MT-TW</i>)</b>   | 13.6% | 5.1%  | 3.6% | 77.6% | <b>86.4%</b> | 14.3% | 15.2% | 26.4% | 44.1% | <b>85.7%</b> | <  | 4%  | 93% | 3%  |    | <b>447</b>  |
| <b>P22<br/>(m.3243A&gt;T<br/><i>MT-TL1</i>)</b>  | 89.6% | 2.9%  | 1.8% | 5.7%  | <b>10.4%</b> | 68.0% | 3.0%  | 3.8%  | 25.1% | <b>32.0%</b> | 3% | 5%  | 91% | 1%  | <  | <b>1042</b> |

Key: n = number of fibres quantified, abnormal = abnormal fibres, either int(+), int(-) or neg, < = proportion of fibres lower than 0.5%

**Supplementary Table S5.** Activity of the respiratory chain complexes measured in muscle homogenates from P1 and P2.

| <b>Patients</b>                         | <b>Complex I/CS</b> | <b>Complex II/CS</b> | <b>Complex III/CS</b> | <b>Complex IV/CS</b> |
|-----------------------------------------|---------------------|----------------------|-----------------------|----------------------|
| <b>P1<br/>(LRPPRC mutations)</b>        | 0.062               | 0.096                | 0.472                 | 0.242                |
| <b>P2<br/>(m.4175G&gt;A<br/>MT-ND1)</b> | 0.001               | 0.070                | 0.634                 | 1.216                |
| <b>Control (n=25)</b>                   | 0.104±0.036         | 0.145±0.047          | 0.554±0.345           | 1.124±0.511          |

Enzyme activities are expressed as nmols NADH oxidised.min<sup>-1</sup>.unit citrate synthase (CS)<sup>-1</sup> for complex I, nmols DCPIP reduced.min<sup>-1</sup>.unit citrate synthase<sup>-1</sup> for complex II and the apparent first-order rate constant (K).sec<sup>-1</sup>.unit citrate synthase<sup>-1</sup> for complexes III and IV (x 10<sup>3</sup>). Control values are shown as mean±standard deviation. DCPIP = 2,6-dichlorophenolindophenol
